# Supplementary material for: Endometrial cancer prognosis in women with endometriosis and adenomyosis: A retrospective nationwide cohort study of 40 840 women
Source: PubMed Central journal article supplement — Int J Cancer. 2021 Dec 27;150(9):1439–46. doi: 10.1002/ijc.33907 (PMC9303796; doi:10.1002/ijc.33907), 2021-12-27

# Endometrial cancer prognosis in women with endometriosis and adenomyosis. A retrospective nationwide cohort study of 40,840 women.

Marjolein Hermens MD, Anne M van Altena MD PhD, Maaike van der Aa PhD, Johan Bulten MD PhD, Huib AAM van Vliet MD PhD, Albert G Siebers PhD, Ruud LM Bekkers MD PhD

## **Supplemental material table of contents**

|                       |        |
|-----------------------|--------|
| Supplemental table 1  | page 2 |
| Supplemental table 2  | page 3 |
| Supplemental figure 1 | page 4 |
| Supplemental figure 2 | page 5 |

**Supplemental table 1 Baseline characteristics for patients included in the Cox proportional hazard analysis.**

|                                                                       | <b>Endometriosis (n=294)</b> | <b>Adenomyosis (n=1,125)</b> | <b>Endometriosis and adenomyosis (n=138)</b> | <b>No endometriosis or adenomyosis (n=33,985)</b> |
|-----------------------------------------------------------------------|------------------------------|------------------------------|----------------------------------------------|---------------------------------------------------|
| <b>Age at endometrial cancer diagnosis in years (IQR)<sup>a</sup></b> | 60 (IQR 53-68)               | 62 (IQR 55-70)               | 57 (IQR 52-65)                               | 66 (IQR 59-75)                                    |
| <b>Year of diagnosis (IQR)<sup>b</sup></b>                            | 2004 (IQR 1997-2010)         | 2004 (IQR 1996-2009)         | 2004 (IQR 1997-2010)                         | 2004 (IQR 1997-2010)                              |
| <b>Endometrial cancer stage<sup>a</sup></b>                           |                              |                              |                                              |                                                   |
| Stage 1                                                               | 240 (81.6%)                  | 1,033 (91.8%)                | 117 (84.8%)                                  | 26,693 (78.5%)                                    |
| Stage 2                                                               | 27 (9.2%)                    | 43 (3.8%)                    | 9 (6.5%)                                     | 2,791 (8.2%)                                      |
| Stage 3                                                               | 18 (6.1%)                    | 41 (3.6%)                    | 10 (7.2%)                                    | 2,909 (8.6%)                                      |
| Stage 4                                                               | 9 (3.1%)                     | 8 (0.7%)                     | 2 (1.4%)                                     | 1,592 (4.7%)                                      |
| <b>Histological tumor type<sup>a</sup></b>                            |                              |                              |                                              |                                                   |
| Endometrioid                                                          | 170 (57.8%)                  | 610 (54.2%)                  | 76 (55.1%)                                   | 18,599 (54.7%)                                    |
| Clear cell                                                            | 0 (0.0%)                     | 10 (0.9%)                    | 0 (0.0%)                                     | 482 (1.4%)                                        |
| Serous                                                                | 6 (2.0%)                     | 13 (1.2%)                    | 0 (0.0%)                                     | 951 (2.8%)                                        |
| Mucinous                                                              | 5 (1.7%)                     | 8 (0.7%)                     | 1 (0.7%)                                     | 286 (0.8%)                                        |
| Adenocarcinoma NOS                                                    | 113 (38.4%)                  | 484 (43.0%)                  | 61 (44.2%)                                   | 13,668 (40.2%)                                    |
| <b>Histological grading<sup>a</sup></b>                               |                              |                              |                                              |                                                   |
| Low                                                                   | 156 (53.1%)                  | 657 (58.4%)                  | 92 (66.7%)                                   | 15,035 (44.2%)                                    |
| Intermediate                                                          | 90 (30.6%)                   | 335 (29.8%)                  | 39 (28.3%)                                   | 12,098 (35.6%)                                    |
| High                                                                  | 48 (16.3%)                   | 133 (11.8%)                  | 7 (5.1%)                                     | 6,714 (19.8%)                                     |
| <b>Surgery<sup>a</sup></b>                                            |                              |                              |                                              |                                                   |
| Yes                                                                   | 282 (95.9%)                  | 1,119 (99.5%)                | 137 (99.3%)                                  | 32,532 (95.7%)                                    |
| No                                                                    | 12 (4.1%)                    | 6 (0.5%)                     | 1 (0.7%)                                     | 1,453 (4.3%)                                      |
| <b>Chemotherapy<sup>a</sup></b>                                       |                              |                              |                                              |                                                   |
| Yes                                                                   | 15 (5.1%)                    | 15 (1.3%)                    | 4 (2.9%)                                     | 1,128 (3.3%)                                      |
| No                                                                    | 279 (94.9%)                  | 1,110 (98.7%)                | 134 (97.1%)                                  | 32,857 (96.7%)                                    |
| <b>Vital status as of January 31, 2020<sup>a</sup></b>                |                              |                              |                                              |                                                   |
| Alive                                                                 | 175 (59.5%)                  | 664 (59.0%)                  | 96 (69.6%)                                   | 16,424 (48.3%)                                    |
| Passed away                                                           | 119 (40.5%)                  | 461 (41.0%)                  | 42 (30.4%)                                   | 17,561 (51.7%)                                    |

Data are in numbers (percentage) unless otherwise specified. IQR = interquartile range, NOS= Not Otherwise Specified

<sup>a</sup> p<0.005 for comparison between patients with endometrial cancer with histological proven endometriosis and /or adenomyosis and those without.

<sup>b</sup> p value not statistically significant for comparison between patients with endometrial cancer with histological proven endometriosis and / or adenomyosis and those without.

**Supplemental table 2 Hazard ratios of overall survival among women with endometrial cancer in univariable and multivariable analysis (n=35,542).**

|                                             | <b>Univariable analysis<br/>Hazard Ratio (95%CI)</b> | <b>Multivariable analysis<br/>Hazard Ratio (95%CI)</b> |
|---------------------------------------------|------------------------------------------------------|--------------------------------------------------------|
| <b>Endometriosis/adenomyosis</b>            | 0.63 (0.59-0.69) <sup>b</sup>                        | 0.98 (0.90-1.06) <sup>c</sup>                          |
| <b>Age</b>                                  | 1.09 (1.08-1.09) <sup>b</sup>                        | 1.08 (1.08-1.08) <sup>b</sup>                          |
| <b>Endometrial cancer stage<sup>a</sup></b> |                                                      |                                                        |
| Stage 1                                     | 1.00 (ref)                                           | 1.00 (ref)                                             |
| Stage 2                                     | 1.64 (1.56-1.72) <sup>b</sup>                        | 1.40 (1.33-1.47) <sup>b</sup>                          |
| Stage 3                                     | 2.69 (2.57-2.81) <sup>b</sup>                        | 2.31 (2.20-2.42) <sup>b</sup>                          |
| Stage 4                                     | 7.38 (6.98-7.80) <sup>b</sup>                        | 4.23 (3.95-4.52) <sup>b</sup>                          |
| <b>Histological tumor type<sup>a</sup></b>  |                                                      |                                                        |
| Endometrioid                                | 1.00 (ref)                                           | 1.00 (ref)                                             |
| Clear cell                                  | 2.12 (1.91-2.37) <sup>b</sup>                        | 1.10 (0.98-1.23) <sup>b</sup>                          |
| Serous                                      | 3.13 (2.89-3.38) <sup>b</sup>                        | 1.25 (1.14-1.36) <sup>b</sup>                          |
| Mucinous                                    | 1.28 (1.10-1.48) <sup>b</sup>                        | 1.04 (0.90-1.21) <sup>b</sup>                          |
| Adenocarcinoma NOS                          | 1.29 (1.25-1.33) <sup>b</sup>                        | 1.20 (1.16-1.24) <sup>b</sup>                          |
| <b>Histological grading<sup>a</sup></b>     |                                                      |                                                        |
| Low                                         | 1.00 (ref)                                           | 1.00 (ref)                                             |
| Intermediate                                | 1.48 (1.43-1.53) <sup>b</sup>                        | 1.21 (1.17-1.25) <sup>b</sup>                          |
| High                                        | 2.65 (2.56-2.76) <sup>b</sup>                        | 1.71 (1.64-1.78) <sup>b</sup>                          |
| <b>Surgery</b>                              | 0.14 (0.13-0.15) <sup>b</sup>                        | 0.39 (0.36-0.41) <sup>b</sup>                          |
| <b>Chemotherapy</b>                         | 2.56 (2.39-2.75) <sup>b</sup>                        | 1.22 (1.12-1.32) <sup>b</sup>                          |

Only significant factors in univariable analysis are displayed.

NOS = not otherwise specified.

<sup>a</sup>p-value < 0.0005 for categorical factor in univariable and multivariable analyses. <sup>b</sup>p-value < 0.0005. <sup>c</sup>p-value not statistically significant.

**Supplemental figure 1 Kaplan-Meier curve of overall survival, by endometriosis/adenomyosis status (binary).**

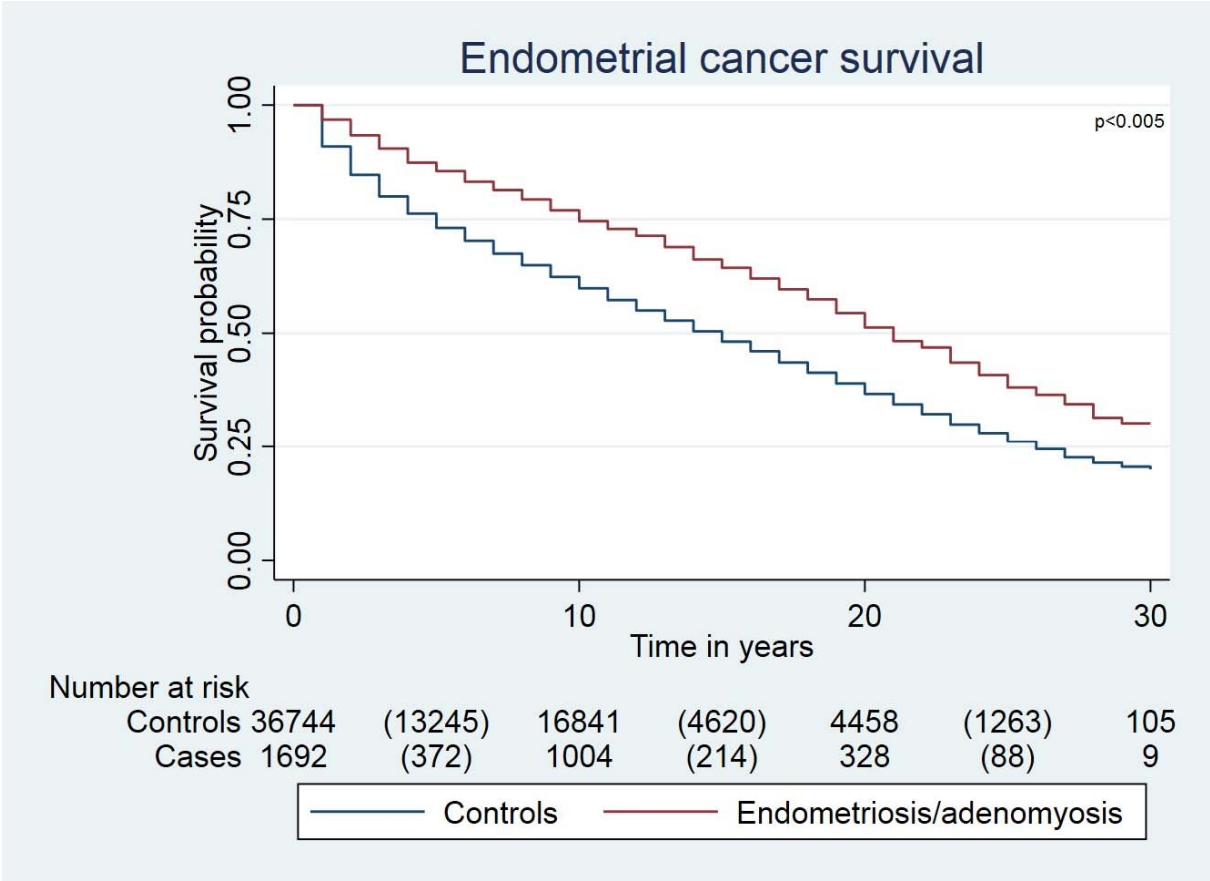

**Supplemental figure 2 Kaplan-Meier curve of overall survival, by endometriosis/adenomyosis status (binary) per low/high stage disease and histological subtype.**

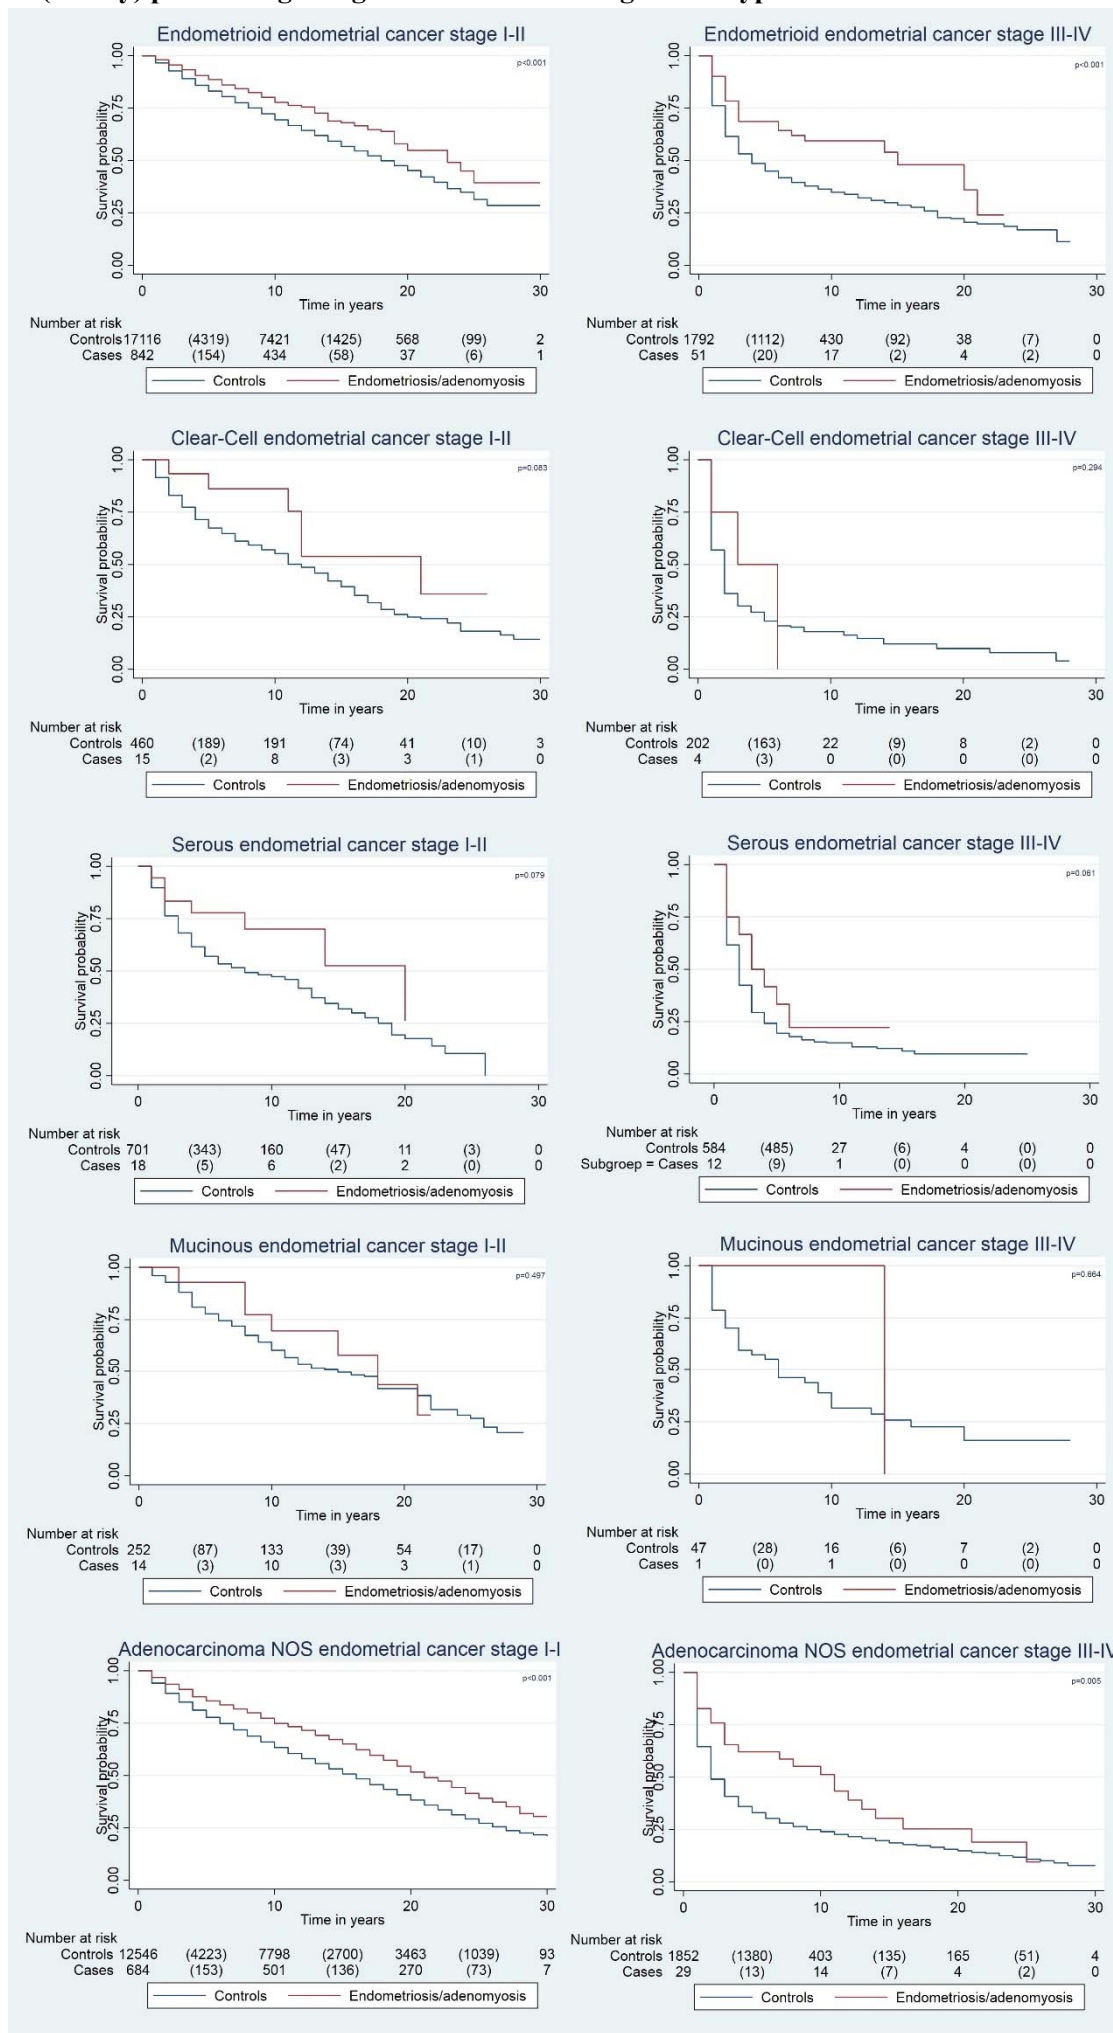

Supplement: IJC-150-1439-s001.pdf [file IJC-150-1439-s001.pdf]
